# Supplementary material for: Virulence Genes of Staphylococcus aureus Associated With Keratitis, Conjunctivitis, and Contact Lens–Associated Inflammation
Source: PubMed Central journal article supplement — Transl Vis Sci Technol. 2022 Jul 8;11(7):5. doi: 10.1167/tvst.11.7.5 (PMC9279920; doi:10.1167/tvst.11.7.5), 2022-07-08
Supplement: tvst-11-7-5_s001.pdf [file tvst-11-7-5_s001.pdf]

**Supplementary Table 1.** *S. aureus* ocular isolates from different ocular conditions used in the study.

| <b><i>S. aureus</i> strains</b> | <b>Year of isolation</b> | <b>Ocular condition</b>                                                 |
|---------------------------------|--------------------------|-------------------------------------------------------------------------|
| 106                             | <b>2004</b>              | <b>Microbial Keratitis, USA</b><br>(Bascom Palmer Institute, Miami, FL) |
| 107                             |                          |                                                                         |
| 108                             |                          |                                                                         |
| 109                             |                          |                                                                         |
| 110                             |                          |                                                                         |
| 111                             |                          |                                                                         |
| 112                             |                          |                                                                         |
| 113                             |                          |                                                                         |
| 114                             |                          |                                                                         |
| M5-01                           |                          |                                                                         |
| M19-01                          |                          |                                                                         |
| M27-01                          |                          |                                                                         |
| M28-01                          |                          |                                                                         |
| M30-01                          |                          |                                                                         |
| M36-01                          |                          |                                                                         |
| M43-01                          |                          |                                                                         |
| M49-02                          |                          |                                                                         |
| M65-01                          |                          |                                                                         |
| M71-01                          |                          |                                                                         |
| M90-01                          |                          |                                                                         |
| M91-01                          |                          |                                                                         |
| 34                              | <b>1997</b>              |                                                                         |
| 129                             | <b>2006</b>              |                                                                         |
| 84                              | <b>2004</b>              | <b>Conjunctivitis, USA</b><br>(Bascom Palmer Institute, Miami, FL)      |
| 85                              |                          |                                                                         |
| 86                              |                          |                                                                         |
| 87                              |                          |                                                                         |
| 88                              |                          |                                                                         |
| 89                              |                          |                                                                         |
| 90                              |                          |                                                                         |
| 91                              |                          |                                                                         |
| 92                              |                          |                                                                         |
| 93                              |                          |                                                                         |
| 94                              |                          |                                                                         |
| 95                              |                          |                                                                         |
| 96                              |                          |                                                                         |
| 97                              |                          |                                                                         |
| 98                              |                          |                                                                         |
| 99                              |                          |                                                                         |
| 100                             |                          |                                                                         |
| 101                             |                          |                                                                         |
| 102                             |                          |                                                                         |
| 103                             |                          |                                                                         |

|     |             |                                                                                                                                              |
|-----|-------------|----------------------------------------------------------------------------------------------------------------------------------------------|
| 104 |             |                                                                                                                                              |
| 105 |             |                                                                                                                                              |
| 46  | <b>2006</b> | <b>Conjunctivitis, Australia</b><br>(Prince of Wales Hospital, Randwick, NSW)                                                                |
| 134 |             |                                                                                                                                              |
| 136 |             |                                                                                                                                              |
| 140 |             |                                                                                                                                              |
| 12  |             |                                                                                                                                              |
| 20  | <b>1995</b> | <b>Contact lens-related non-infectious corneal infiltrative events, Australia</b><br>(School of Optometry and Vision Science, Randwick, NSW) |
| 24  | <b>1996</b> |                                                                                                                                              |
| 25  |             |                                                                                                                                              |
| 26  |             |                                                                                                                                              |
| 27  |             |                                                                                                                                              |
| 28  | <b>1997</b> |                                                                                                                                              |
| 29  |             |                                                                                                                                              |
| 31  |             |                                                                                                                                              |
| 32  |             |                                                                                                                                              |
| 33  |             |                                                                                                                                              |
| 48  | <b>2001</b> |                                                                                                                                              |
| 117 | <b>1999</b> |                                                                                                                                              |
| 41  |             |                                                                                                                                              |

**Supplementary Table 2.** PCR primers and conditions for the selected virulence determinants

| Gene            | 5' to 3' primer sequence                | aT (°C) | Base pairs       |
|-----------------|-----------------------------------------|---------|------------------|
| <i>fnbpA</i> -F | 5'-CACAACCAGCAAATATAG-3'                | 50      | 1362bp (43)      |
| <i>fnbpA</i> -R | 5'-CTGTGTGGTAATCAATGTC-3'               |         |                  |
| <i>eap</i> -F   | 5'-TACTAACGAAGCATCTGCC-3'               | 50      | 230bp (51)       |
| <i>eap</i> -R   | TTAAATCGATATCACTAATACCTC                |         |                  |
| <i>clfA</i> -F  | 5'-GGC TTC AGT GCT TGT AGG 3 '          | 57      | 980bp (44)       |
| <i>clfA</i> -R  | 3'- TTT TCA GGG TCA ATA TAA GC 5'       |         |                  |
| <i>hla</i> -F   | 5'-CCATATACCGGGTTCCAAGA 3'              | 57      | *(45)            |
| <i>hla</i> -R   | 3'-CGGTAACGTGACTGGTGATG 5'              |         |                  |
| <i>coa</i> -F   | 5'-GTCAAGCAGTTATTAACACCAGAC-3'          | 55      | 1120bp (11)      |
| <i>coa</i> -R   | 5'-AATCAGTAATTGCACTTTGTCCAC TG-3'       |         |                  |
| <i>scpA</i> -F  | AGGAGTTTTTATATGAAAAG                    | 50      | 1235,1236bp (78) |
| <i>scpA</i> -R  | TACCTTTCTAAAATACAAAT                    |         |                  |
| <i>sspB</i> -F  | 5' -TTTGATTAAATGGAGGGTA-3'              |         |                  |
| <i>sspB</i> -R  | 5'- CCTGCC TTTAATCAATATCT-3'            |         |                  |
| <i>sspA</i> -F  | 5'- TCCACAACAAACGCAGTCAAG CA-3'         | 58      | 654bp (46)       |
| <i>sspA</i> -R  | ACACCGCCCCAATGAATTCCGA                  |         |                  |
| <i>seb</i> -F   | 5'-GTATGGTGGTGTAAGTACTGAGC-3'           | 57      | 164bp (50)       |
| <i>seb</i> -R   | 5'-CCAAATAGTGACGACGAGTTA GG-3'          |         |                  |
| <i>hlg-1</i>    | 5'-GCCAATCCGTTATTAGAAAAT GC-3'          | 55      | 937bp (40)       |
| <i>hlg-2</i>    | 5'-CCATAGACGTAGCAACGGAT-3'              |         |                  |
| <i>hld-1</i>    | 5'-GAATTTGTTCACTGTGTCG-3'               | 50      | 357bp (48)       |
| <i>hld-2</i>    | 5'-TTTACACCACTCTCCTCAC-3'               |         |                  |
| <i>pvl</i> -F   | 5'-ATCATTAGGTAATAATGTCTGGACA TGATCCA-3' | 55      | 433bp (49)       |
| <i>pvl</i> -R   | 5'-GCATCAASTGTATTGGATAGCAAA AGC-3'      |         |                  |

aT (°C) indicates annealing temperature; \*, polymorphic.

**Supplementary Table S3.** *S. aureus* strains by condition showing presence or absence of *mecA* gene and known virulence genes involved in adhesion, evasion, and invasion.

| Strain           | Condition | PCR results for possession of virulence genes (1=present; 0=absent) |             |              |            |             |             |             |            |            |            |            |            |            |
|------------------|-----------|---------------------------------------------------------------------|-------------|--------------|------------|-------------|-------------|-------------|------------|------------|------------|------------|------------|------------|
|                  |           | <i>mecA</i>                                                         | Adhesion    |              |            | Evasion     |             |             |            |            |            | Invasion   |            |            |
|                  |           |                                                                     | <i>clfA</i> | <i>fibpA</i> | <i>eap</i> | <i>scpA</i> | <i>sspB</i> | <i>sspA</i> | <i>coa</i> | <i>seb</i> | <i>hla</i> | <i>hlg</i> | <i>hld</i> | <i>pvl</i> |
| 106              | MK USA    | 0                                                                   | 1           | 1            | 1          | 0           | 1           | 1           | 1          | 0          | 1          | 1          | 1          | 0          |
| 107              |           | 0                                                                   | 0           | 1            | 1          | 0           | 1           | 1           | 1          | 0          | 1          | 1          | 1          | 0          |
| 108              |           | 0                                                                   | 1           | 1            | 1          | 0           | 1           | 1           | 1          | 0          | 1          | 1          | 1          | 0          |
| 109              |           | 1                                                                   | 0           | 1            | 1          | 0           | 1           | 1           | 1          | 1          | 1          | 1          | 1          | 0          |
| 110              |           | 1                                                                   | 0           | 1            | 1          | 0           | 1           | 1           | 1          | 1          | 1          | 1          | 1          | 1          |
| 111              |           | 1                                                                   | 1           | 1            | 1          | 0           | 1           | 1           | 1          | 0          | 1          | 1          | 1          | 0          |
| 112              |           | 1                                                                   | 1           | 1            | 1          | 0           | 1           | 1           | 1          | 0          | 1          | 1          | 1          | 0          |
| 113              |           | 1                                                                   | 1           | 1            | 1          | 0           | 1           | 1           | 1          | 0          | 1          | 1          | 1          | 0          |
| 114              |           | 0                                                                   | 1           | 1            | 1          | 0           | 1           | 1           | 1          | 0          | 1          | 1          | 1          | 0          |
| <b>Frequency</b> |           | 55%                                                                 | 67%         | 100%         | 100%       | 0%          | 100%        | 100%        | 100%       | 22%        | 100%       | 100%       | 100%       | 11%        |
| 129              | MK AUS    | 0                                                                   | 1           | 1            | 1          | 0           | 1           | 1           | 1          | 0          | 1          | 1          | 1          | 0          |
| 34               |           | 0                                                                   | 0           | 1            | 1          | 1           | 1           | 1           | 1          | 1          | 1          | 1          | 1          | 0          |
| M5001            |           | 0                                                                   | 1           | 1            | 1          | 1           | 1           | 1           | 1          | 0          | 1          | 1          | 1          | 0          |
| M19001           |           | 0                                                                   | 0           | 1            | 1          | 1           | 1           | 1           | 1          | 0          | 1          | 1          | 1          | 0          |
| M27001           |           | 0                                                                   | 0           | 1            | 1          | 1           | 1           | 1           | 1          | 0          | 1          | 1          | 1          | 0          |
| M28001           |           | 0                                                                   | 1           | 1            | 1          | 1           | 1           | 1           | 1          | 0          | 1          | 1          | 1          | 0          |
| M30001           |           | 0                                                                   | 1           | 1            | 1          | 1           | 1           | 1           | 1          | 1          | 1          | 1          | 1          | 0          |
| M36001           |           | 0                                                                   | 1           | 1            | 1          | 0           | 1           | 1           | 1          | 1          | 1          | 1          | 1          | 0          |
| M43001           |           | 0                                                                   | 1           | 0            | 1          | 1           | 1           | 1           | 1          | 0          | 1          | 1          | 1          | 0          |
| M49002           |           | 0                                                                   | 0           | 1            | 1          | 0           | 1           | 1           | 1          | 0          | 1          | 1          | 1          | 0          |
| M65002           |           | 0                                                                   | 1           | 1            | 1          | 1           | 0           | 1           | 1          | 1          | 1          | 1          | 1          | 0          |
| M71001           |           | 0                                                                   | 1           | 1            | 1          | 1           | 1           | 1           | 1          | 0          | 1          | 1          | 1          | 0          |
| M90001           |           | 0                                                                   | 1           | 1            | 1          | 1           | 0           | 1           | 1          | 1          | 1          | 1          | 1          | 0          |
| M91001           |           | 0                                                                   | 1           | 1            | 1          | 1           | 0           | 1           | 1          | 1          | 1          | 1          | 1          | 0          |
| <b>Frequency</b> |           | 0%                                                                  | 71%         | 93%          | 100%       | 78%         | 78%         | 100%        | 100%       | 43%        | 100%       | 100%       | 100%       | 0%         |
| 84               | Conj. USA | 1                                                                   | 1           | 1            | 1          | 1           | 0           | 1           | 0          | 0          | 0          | 1          | 1          | 1          |
| 85               |           | 0                                                                   | 1           | 1            | 1          | 1           | 1           | 1           | 0          | 1          | 1          | 1          | 1          | 0          |
| 86               |           | 0                                                                   | 1           | 1            | 1          | 1           | 1           | 0           | 1          | 1          | 1          | 1          | 1          | 1          |
| 87               |           | 0                                                                   | 1           | 1            | 1          | 1           | 1           | 1           | 1          | 1          | 1          | 1          | 1          | 0          |
| 88               |           | 1                                                                   | 1           | 1            | 1          | 1           | 1           | 0           | 0          | 1          | 1          | 1          | 0          | 0          |
| 89               |           | 0                                                                   | 1           | 1            | 1          | 1           | 1           | 1           | 0          | 0          | 1          | 1          | 1          | 0          |
| 90               |           | 1                                                                   | 1           | 1            | 1          | 1           | 1           | 1           | 1          | 0          | 1          | 1          | 1          | 0          |

Running title: Virulence genes of *S. aureus* in ocular conditions

|                  |                  |     |     |      |      |      |      |      |      |     |      |      |      |     |
|------------------|------------------|-----|-----|------|------|------|------|------|------|-----|------|------|------|-----|
| 91               |                  | 0   | 1   | 1    | 1    | 0    | 1    | 0    | 1    | 0   | 1    | 1    | 1    | 0   |
| 92               |                  | 0   | 1   | 1    | 1    | 0    | 0    | 1    | 1    | 1   | 1    | 1    | 1    | 0   |
| 93               |                  | 0   | 0   | 1    | 1    | 0    | 1    | 1    | 1    | 0   | 1    | 1    | 1    | 0   |
| 94               |                  | 0   | 0   | 1    | 1    | 0    | 1    | 0    | 1    | 1   | 1    | 1    | 1    | 0   |
| 95               |                  | 0   | 1   | 1    | 1    | 0    | 1    | 1    | 1    | 1   | 1    | 1    | 0    | 0   |
| 96               |                  | 0   | 0   | 1    | 1    | 0    | 1    | 1    | 0    | 1   | 1    | 1    | 1    | 0   |
| 97               |                  | 1   | 1   | 1    | 1    | 0    | 1    | 1    | 1    | 1   | 1    | 1    | 1    | 0   |
| 98               |                  | 1   | 0   | 1    | 1    | 0    | 1    | 1    | 1    | 1   | 1    | 1    | 1    | 0   |
| 99               |                  | 1   | 1   | 1    | 1    | 0    | 0    | 1    | 1    | 1   | 1    | 1    | 0    | 0   |
| 100              |                  | 1   | 1   | 1    | 1    | 0    | 0    | 1    | 1    | 1   | 1    | 1    | 1    | 0   |
| 101              |                  | 1   | 1   | 1    | 1    | 0    | 1    | 1    | 1    | 0   | 1    | 1    | 1    | 1   |
| 102              |                  | 1   | 1   | 1    | 1    | 0    | 1    | 1    | 1    | 1   | 1    | 1    | 1    | 0   |
| 103              |                  | 1   | 1   | 1    | 1    | 0    | 1    | 1    | 1    | 0   | 1    | 1    | 1    | 1   |
| 104              |                  | 1   | 1   | 1    | 1    | 0    | 1    | 1    | 1    | 1   | 1    | 1    | 1    | 0   |
| 105              |                  | 1   | 1   | 1    | 1    | 0    | 1    | 1    | 1    | 1   | 1    | 1    | 1    | 0   |
| <b>Frequency</b> |                  | 54% | 82% | 100% | 100% | 32%  | 82%  | 82%  | 77%  | 68% | 100% | 100% | 86%  | 18% |
| 46               | <b>Conj. AUS</b> | 0   | 1   | 1    | 1    | 1    | 1    | 1    | 1    | 0   | 1    | 1    | 1    | 0   |
| 134              |                  | 0   | 1   | 1    | 1    | 1    | 1    | 1    | 1    | 1   | 1    | 1    | 1    | 0   |
| 136              |                  | 0   | 0   | 1    | 1    | 1    | 1    | 1    | 1    | 0   | 1    | 1    | 1    | 0   |
| 140              |                  | 0   | 1   | 1    | 1    | 1    | 1    | 1    | 1    | 1   | 1    | 1    | 1    | 0   |
| <b>Frequency</b> |                  | 0%  | 75% | 100% | 100% | 100% | 100% | 100% | 100% | 50% | 100% | 100% | 100% | 0%  |
| 12               | <b>niCIE</b>     | 0   | 1   | 1    | 1    | 0    | 0    | 1    | 1    | 0   | 1    | 1    | 0    | 0   |
| 20               |                  | 0   | 0   | 1    | 1    | 1    | 1    | 1    | 1    | 1   | 1    | 1    | 0    | 1   |
| 24               |                  | 0   | 1   | 1    | 1    | 0    | 0    | 0    | 1    | 0   | 1    | 0    | 1    | 1   |
| 25               |                  | 0   | 1   | 1    | 1    | 1    | 1    | 1    | 1    | 1   | 1    | 1    | 1    | 0   |
| 27               |                  | 0   | 1   | 1    | 1    | 1    | 1    | 1    | 1    | 0   | 1    | 1    | 1    | 0   |
| 28               |                  | 0   | 1   | 1    | 1    | 1    | 1    | 1    | 0    | 1   | 1    | 1    | 0    | 0   |
| 32               |                  | 0   | 1   | 1    | 1    | 1    | 1    | 1    | 1    | 0   | 1    | 1    | 1    | 0   |
| 33               |                  | 0   | 1   | 1    | 1    | 1    | 1    | 1    | 0    | 0   | 1    | 0    | 0    | 0   |
| 48               |                  | 0   | 1   | 1    | 1    | 1    | 1    | 1    | 1    | 0   | 1    | 1    | 0    | 0   |
| 117              |                  | 0   | 1   | 1    | 1    | 1    | 0    | 1    | 1    | 0   | 1    | 1    | 0    | 0   |
| 26               |                  | 0   | 1   | 1    | 1    | 1    | 1    | 0    | 1    | 0   | 1    | 1    | 0    | 0   |
| 29               |                  | 1   | 1   | 1    | 1    | 1    | 1    | 0    | 1    | 0   | 1    | 1    | 1    | 0   |
| 31               |                  | 0   | 1   | 1    | 1    | 1    | 1    | 1    | 1    | 0   | 1    | 1    | 1    | 0   |
| 41               |                  | 0   | 1   | 1    | 1    | 1    | 1    | 1    | 1    | 0   | 1    | 1    | 1    | 0   |
| <b>Frequency</b> |                  | 7%  | 93% | 100% | 100% | 86%  | 78%  | 78%  | 86%  | 21% | 100% | 86%  | 50%  | 14% |
